# Supplementary material for: A Novel Approach to Staging and Detection of Colorectal Cancer in Early Stages
Source: MDPI journal article supplement (doi:10.3390/jcm12103530), 2023-05-17
Supplement: s1 [file s1]

**Table S1.** Statistical differences between Study (colorectal cancer) and Control groups.

| Parameter               | <i>p</i> | Parameter                | <i>p</i> | Parameter               | <i>p</i> |
|-------------------------|----------|--------------------------|----------|-------------------------|----------|
| index CCL11/CCR3        | 0.691    | index CXCL16/CA 19-9     | 0.836    | index CCL26/CCL4        | 0.080    |
| index log CCL11/CCR3    | <0.001   | index log CXCL16/CA 19-9 | 0.877    | index log CCL26/CCL4    | 0.117    |
| index CCL24/CCR3        | 0.683    | index CXCL16/CRP         | <0.001   | index CCL26/CXCL16      | 0.948    |
| index log CCL24/CCR3    | <0.001   | index log CXCL16/CRP     | 0.224    | index log CCL26/CXCL16  | 0.876    |
| index CCL26/CCR3        | 0.003    | index CXCL5/CEA          | <0.001   | index CCL26/CXCL5       | 0.393    |
| index log CCL26/CCR3    | 0.022    | index log CXCL5/CEA      | 0.177    | index log CCL26/CXCL5   | 0.387    |
| index CCL11/CEA         | 0.037    | index CXCL5/CA 19-9      | 0.369    | index CCL26/CXCL14      | 0.295    |
| index log CCL11/CEA     | 0.023    | index log CXCL5/CA 19-9  | 0.863    | index log CCL26/CXCL14  | 0.399    |
| index CCL11/CA 19-9     | 0.030    | index CXCL5/CRP          | <0.001   | index CCR3/CCL2         | 0.336    |
| index log CCL11/CA 19-9 | 0.021    | index log CXCL5/CRP      | 0.319    | index log CCR3/CCL2     | 0.007    |
| index CCL11/CRP         | <0.001   | index CXCL14/CEA         | <0.001   | index CCR3/CCL15        | 0.327    |
| index log CCL11/CRP     | 0.717    | index log CXCL14/CEA     | 0.231    | index log CCR3/CCL15    | 0.042    |
| index CCL24/CEA         | 0.046    | index CXCL14/CA 19-9     | 0.196    | index CCR3/CCL4         | 0.251    |
| index log CCL24/CEA     | 0.037    | index log CXCL14/CA 19-9 | 0.634    | index log CCR3/CCL4     | 0.140    |
| index CCL24/CA 19-9     | 0.041    | index CXCL14/CRP         | <0.001   | index CCR3/CXCL16       | 0.009    |
| index log CCL24/CA 19-9 | 0.046    | index log CXCL14/CRP     | 0.164    | index log CCR3/CXCL16   | 0.159    |
| index CCL24/CRP         | <0.001   | index CCL11/ CCL24       | 0.950    | index CCR3/CXCL5        | 0.581    |
| index log CCL24/CRP     | 0.629    | index log CCL11/ CCL24   | 0.214    | index log CCR3/CXCL5    | 0.055    |
| index CCL26/CEA         | 0.001    | index CCL11/ CCL26       | 0.031    | index CCR3/CXCL14       | <0.001   |
| index log CCL26/CEA     | 0.026    | index log CCL11/ CCL26   | 0.032    | index log CCR3/CXCL14   | 0.280    |
| index CCL26/CA 19-9     | 0.196    | index CCL11/ CCL2        | 0.979    | index CCL2/ CCL15       | 0.187    |
| index log CCL26/CA 19-9 | 0.101    | index log CCL11/ CCL2    | 0.366    | index log CCL2/ CCL15   | 0.117    |
| index CCL26/CRP         | <0.001   | index CCL11/ CCL15       | 0.094    | index CCL2/ CCL4        | 0.667    |
| index log CCL26/CRP     | 0.421    | index log CCL11/ CCL15   | 0.067    | index log CCL2/ CCL4    | 0.549    |
| index CCR3/CEA          | 0.048    | index CCL11/ CCL4        | 0.865    | index CCL2/CXCL16       | 0.105    |
| index log CCR3/CEA      | 0.125    | index log CCL11/ CCL4    | 0.399    | index log CCL2/CXCL16   | 0.087    |
| index CCR3/CA 19-9      | 0.030    | index CCL11/CXCL16       | 0.029    | index CCL2/CXCL5        | 0.881    |
| index log CCR3/CA 19-9  | 0.646    | index log CCL11/CXCL16   | 0.068    | index log CCL2/CXCL5    | 0.858    |
| index CCR3/CRP          | <0.001   | index CCL11/CXCL5        | 0.123    | index CCL2/CXCL14       | 0.001    |
| index log CCR3/CRP      | 0.186    | index log CCL11/CXCL5    | 0.090    | index log CCL2/CXCL14   | <0.001   |
| index CCL2/CEA          | <0.001   | index CCL11/CXCL14       | 0.028    | index CCL15/ CCL4       | 0.255    |
| index log CCL2/CEA      | 0.179    | index log CCL11/CXCL14   | 0.030    | index log CCL15/ CCL4   | 0.196    |
| index CCL12/CA 19-9     | 0.360    | index CCL24/CCL26        | 0.163    | index CCL15/CXCL16      | 0.909    |
| index log CCL2/CA 19-9  | 0.795    | index log CCL24/CCL26    | 0.109    | index log CCL15/CXCL16  | 0.923    |
| index CCL2/CRP          | <0.001   | index CCL24/CCL2         | 0.638    | index CCL15/CXCL5       | 0.050    |
| index log CCL2/CRP      | 0.249    | index log CCL24/CCL2     | 0.602    | index log CCL15/CXCL5   | 0.043    |
| index CCL15/CEA         | <0.001   | index CCL24/CCL15        | 0.266    | index CCL15/CXCL5       | 0.378    |
| index log CCL15/CEA     | 0.208    | index log CCL24/15       | 0.266    | index log CCL15/CXCL5   | 0.327    |
| index CCL15/CA 19-9     | 0.663    | index CCL24/4            | 0.849    | index CCL4/CXCL16       | 0.028    |
| index log CCL15/CA 19-9 | 0.663    | index log CCL24/4        | 0.988    | index log CCL4/CXCL16   | 0.030    |
| index CCL15/CRP         | <0.001   | index CCL24/CXCL16       | 0.294    | index CCL4/CXCL5        | 0.813    |
| index log CCL15/CRP     | 0.238    | index log CCL24/CXCL16   | 0.298    | index log CCL4/CXCL5    | 0.719    |
| index CCL4/CEA          | <0.001   | index CCL24/CXCL5        | 0.328    | index CCL4/CXCL14       | 0.001    |
| index log CCL4/CEA      | 0.206    | index log CCL24/CXCL5    | 0.355    | index log CCL4/CXCL14   | 0.001    |
| index CCL4/CA 19-9      | 0.418    | index CCL24/CXCL14       | 0.212    | index CXCL16/CXCL5      | 0.012    |
| index log CCL4/CA 19-9  | 0.759    | index log CCL24/CXCL14   | 0.194    | index log CXCL16/CXCL5  | 0.011    |
| index CCL4/CRP          | <0.001   | index CCL26/CCL2         | 0.008    | index CXCL16/CXCL14     | 0.038    |
| index log CCL4/CRP      | 0.264    | index log CCL26/CCL2     | 0.015    | index log CXCL16/CXCL14 | 0.035    |
| index CXCL16/CEA        | <0.001   | index CCL26/CCL15        | 0.589    | index CXCL5/CXCL14      | 0.001    |
| index log CXCL16/CEA    | 0.220    | index log CCL26/CCL15    | 0.820    | index log CXCL5/CXCL14  | 0.001    |

*p*—statistical significance assessed by the Mann-Whitney U test.
